# Supplementary material for: Gold Nanoplates as Cancer-Targeted Photothermal Actuators for Drug Delivery and Triggered Release
Source: Hindawi journal article supplement (doi:10.1155/2016/2036029), 2016-01-01
Supplement: f1 [file 2036029.f1.pdf]

**Supporting Information for**

**Gold Nanoplates as Cancer-Targeted Photothermal**

**Actuators for Drug Delivery and Triggered Release**

Tyler Brann<sup>\*</sup>, Dhruvinkumar Patel<sup>1\*</sup>, Rajat Chauhan<sup>1†</sup>, Kurtis T. James<sup>1†</sup>, Paula J. Bates<sup>2</sup>,

Mohammad Tariq Malik<sup>2</sup>, Robert S. Keynton<sup>1</sup>, Martin G. O' Toole<sup>1</sup>

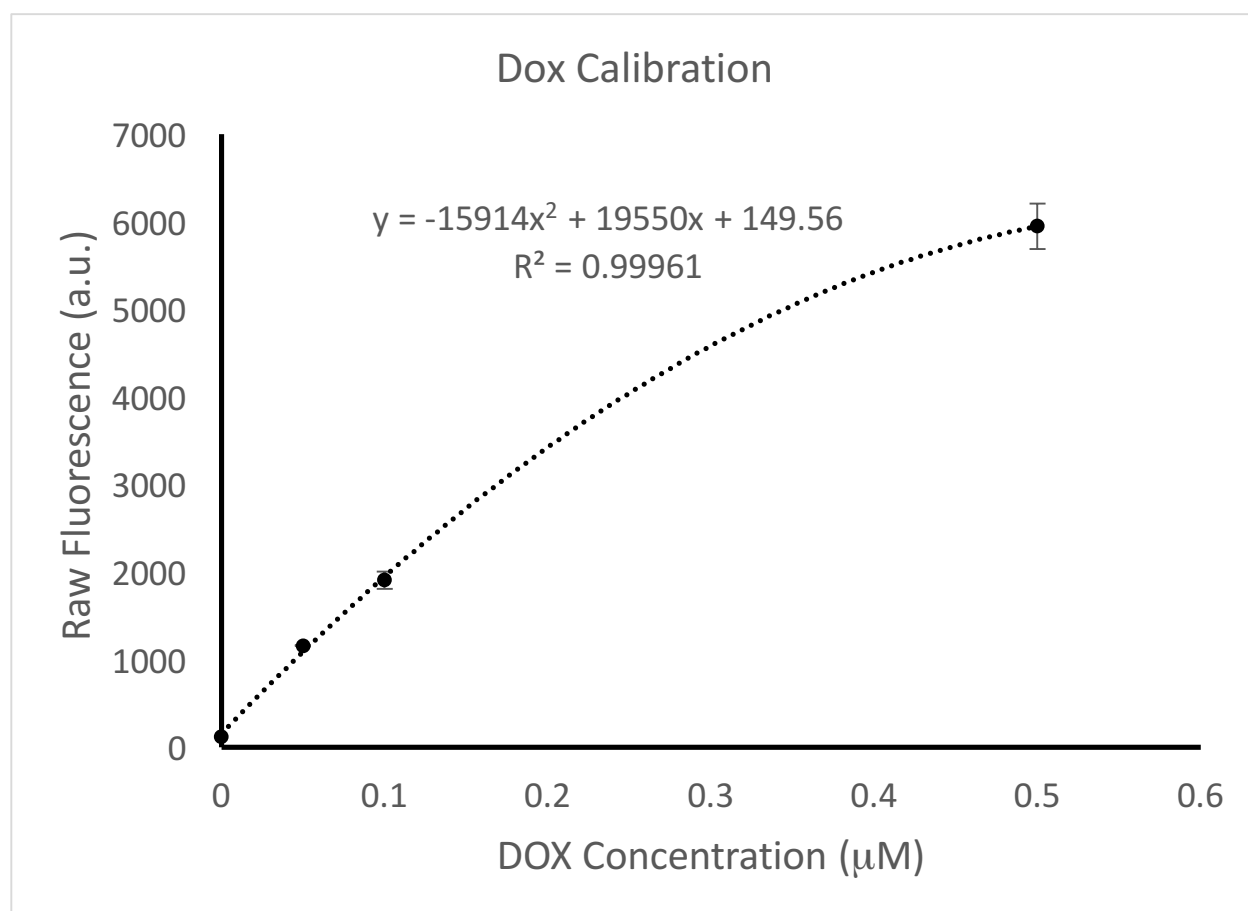

**Figure S1.** Fluorescence calibration curve ( $n = 3$ ) for doxorubicin used to determine amount loaded onto gold nanoplates.

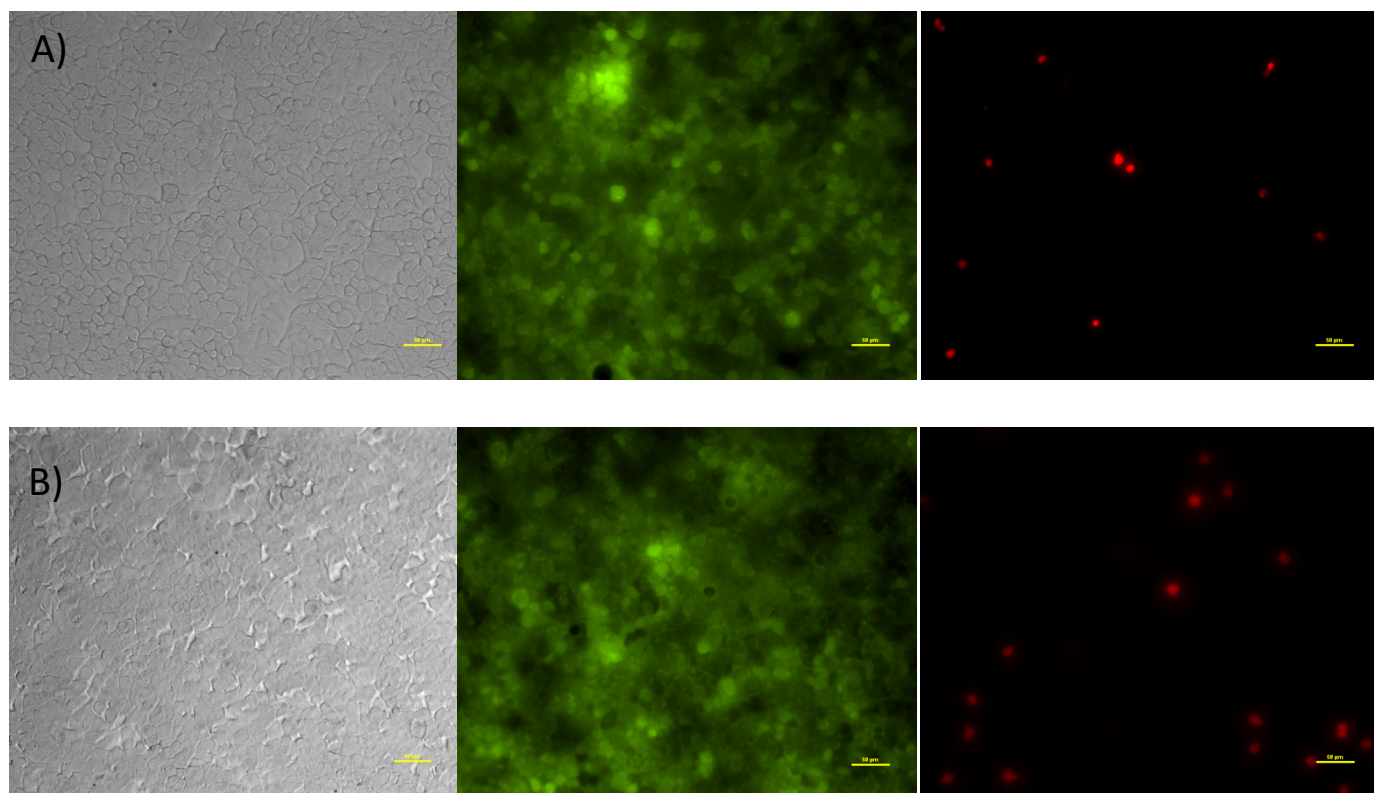

**Figure S2.** Bright field (left), Fluorescence (live cells) (middle), and fluorescence (dead cells) (right) for A549 cells with A) No nanoparticles, no laser; B) No nanoparticles, laser.

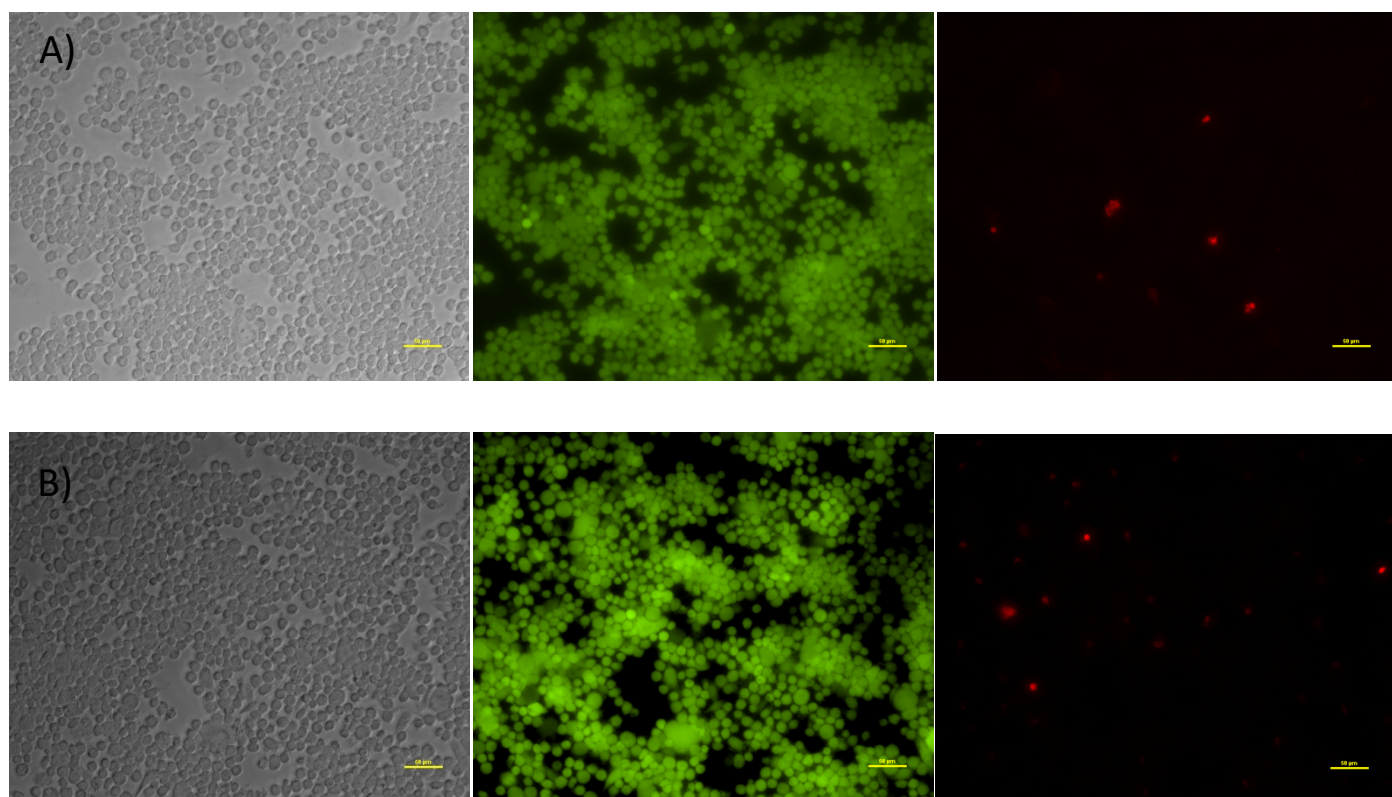

**Figure S3.** Bright field (left), Fluorescence (live cells) (middle), and fluorescence (dead cells) (right) for MDA-MB-231 cells with A) No nanoparticles, no laser; B) No nanoparticles, laser.

**Table S1.** Raw Fluorescence Measurements used in DOX loading study.

|                                       | Raw<br>Fluorescence<br>1 | Raw<br>Fluorescence<br>2 | Raw<br>Fluorescence<br>3 | Raw<br>Fluorescence<br>Avg. |
|---------------------------------------|--------------------------|--------------------------|--------------------------|-----------------------------|
| GNP-Hairpin<br>Control                | 220.72                   | 210.11                   | 212.92                   | 214.5833333                 |
| GNP-Hairpin<br>Supernatant            | 375.92                   | 389.57                   | 375.73                   | 380.4066667                 |
| GNP-AS1411<br>Control                 | 244.81                   | 257.12                   | 251.61                   | 251.18                      |
| GNP-AS1411<br>DOX<br>Supernatant      | 389.47                   | 366.88                   | 370.52                   | 375.6233333                 |
| GNP-AS1411-<br>Hairpin Control        | 239.01                   | 248.17                   | 240.8                    | 242.66                      |
| GNP-AS1411-<br>Hairpin<br>Supernatant | 326.74                   | 324.78                   | 325.61                   | 325.71                      |
